# Supplementary material for: Self-reversible mechanofluorochromic AIEgens with tunable solid-state fluorescence: effect of acceptors and intermolecular interactions
Source: Royal Society of Chemistry journal article supplement (doi:10.1039/d4ce00729h), 2024-01-01
Supplement: d4ce00729h1.pdf [file d4ce00729h1.pdf]

### Electronic Supplementary Information (ESI)

#### Self-reversible mechanofluorochromic AIEgens with tunable solid-state fluorescence: effect of acceptor and intermolecular interactions

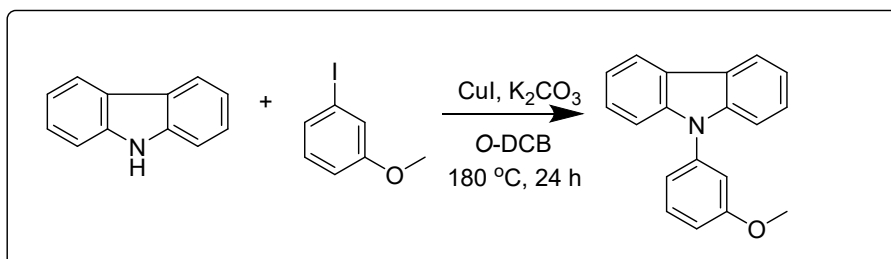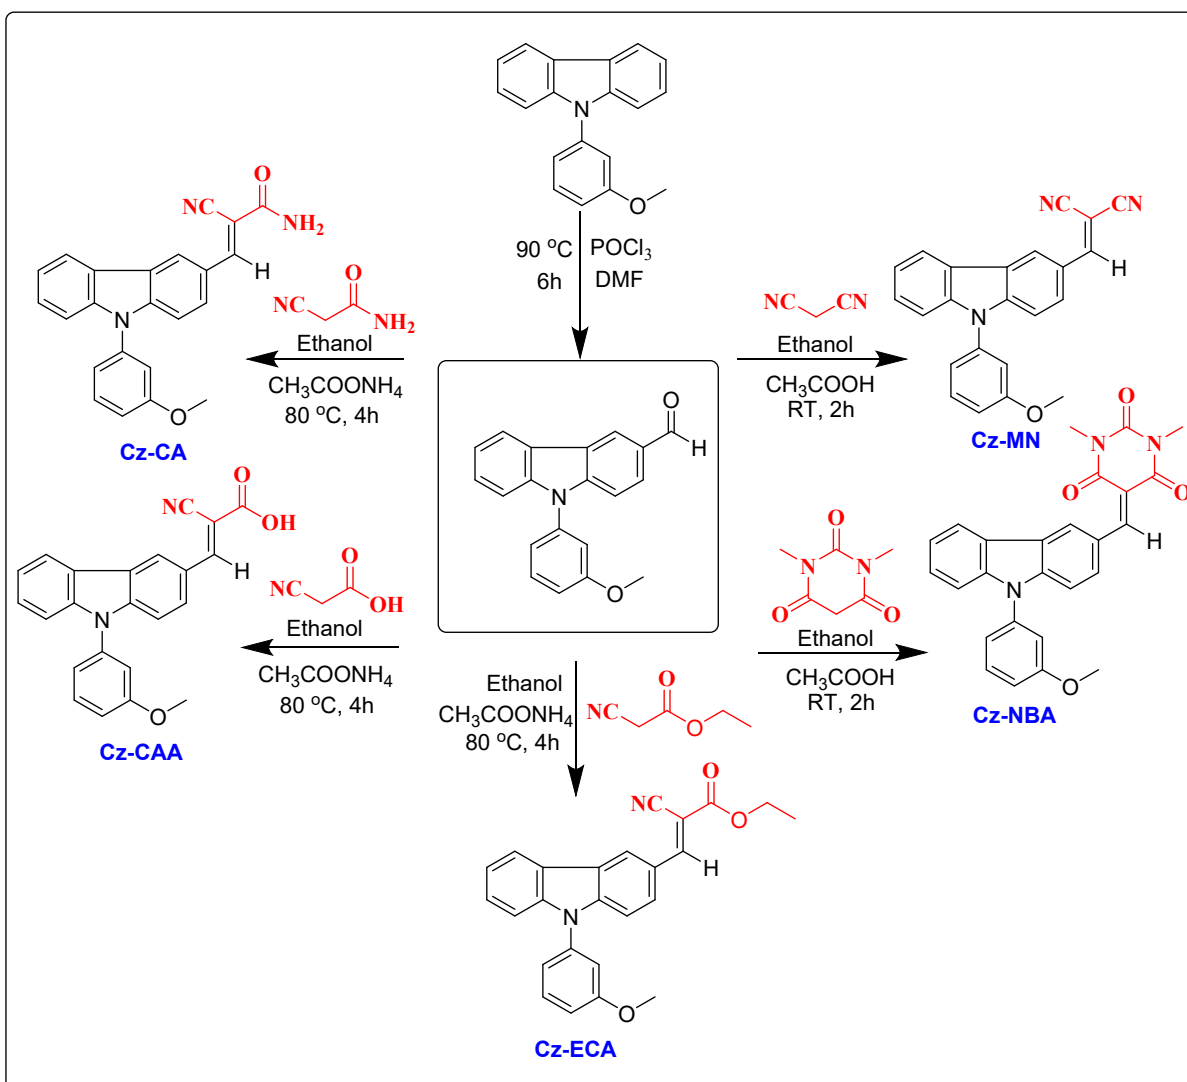

Scheme S1. Synthesis of carbazole derivatives with different acceptor units.

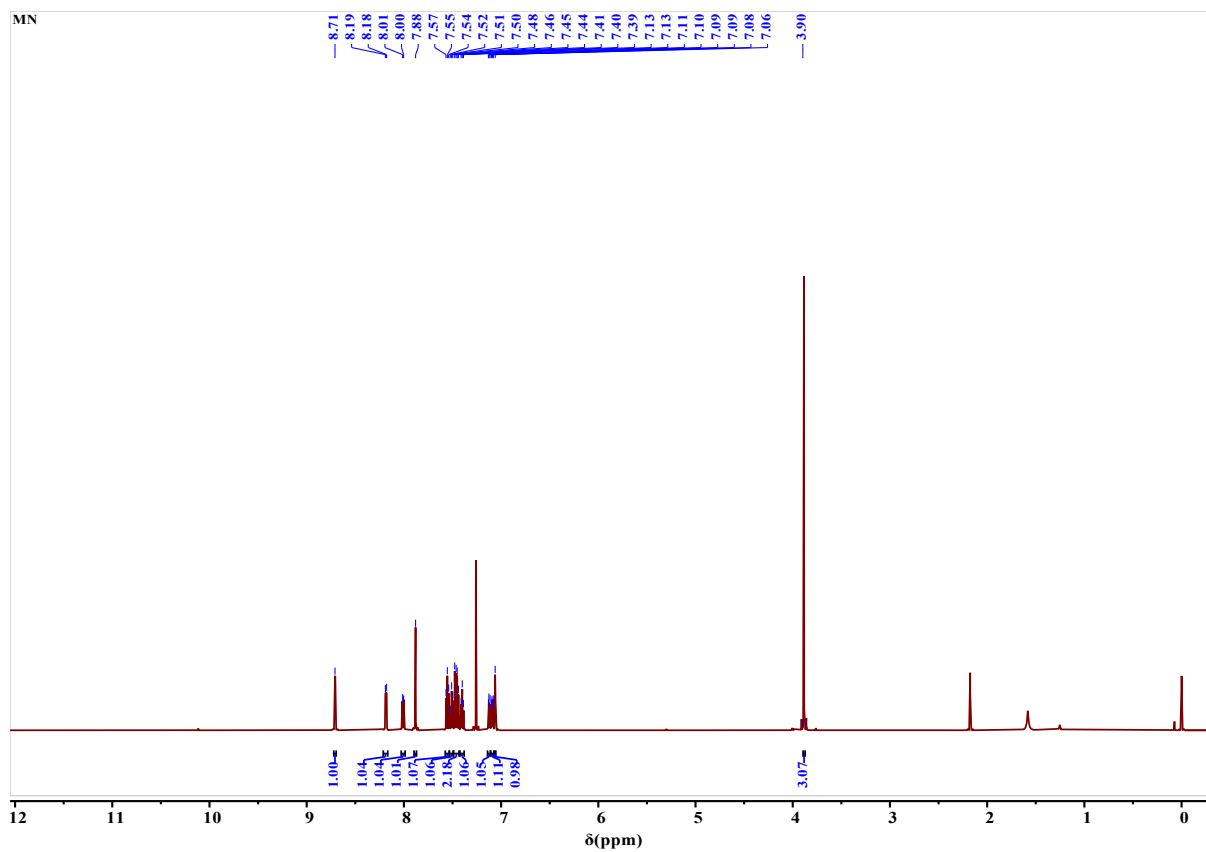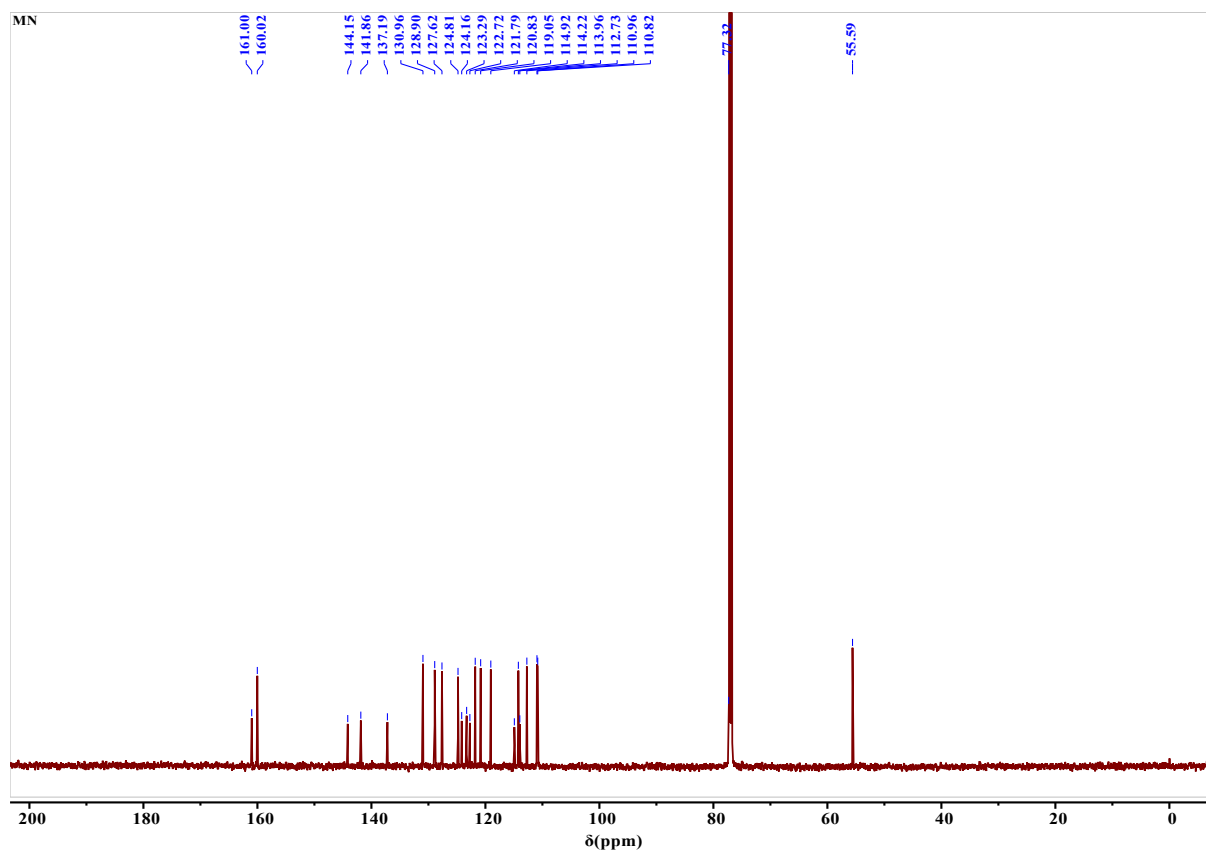

$^1\text{H}$  and  $^{13}\text{C}$  NMR of Cz-MN in  $\text{CDCl}_3$ .

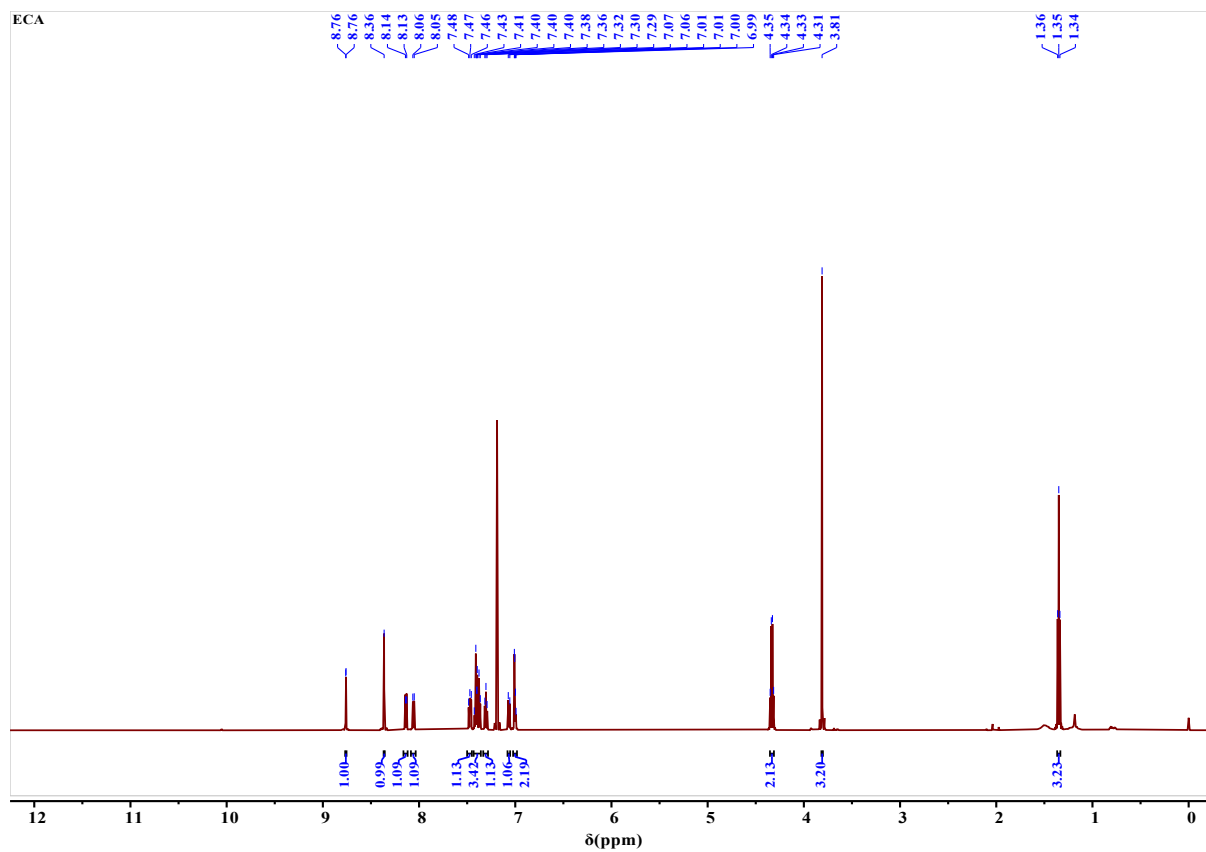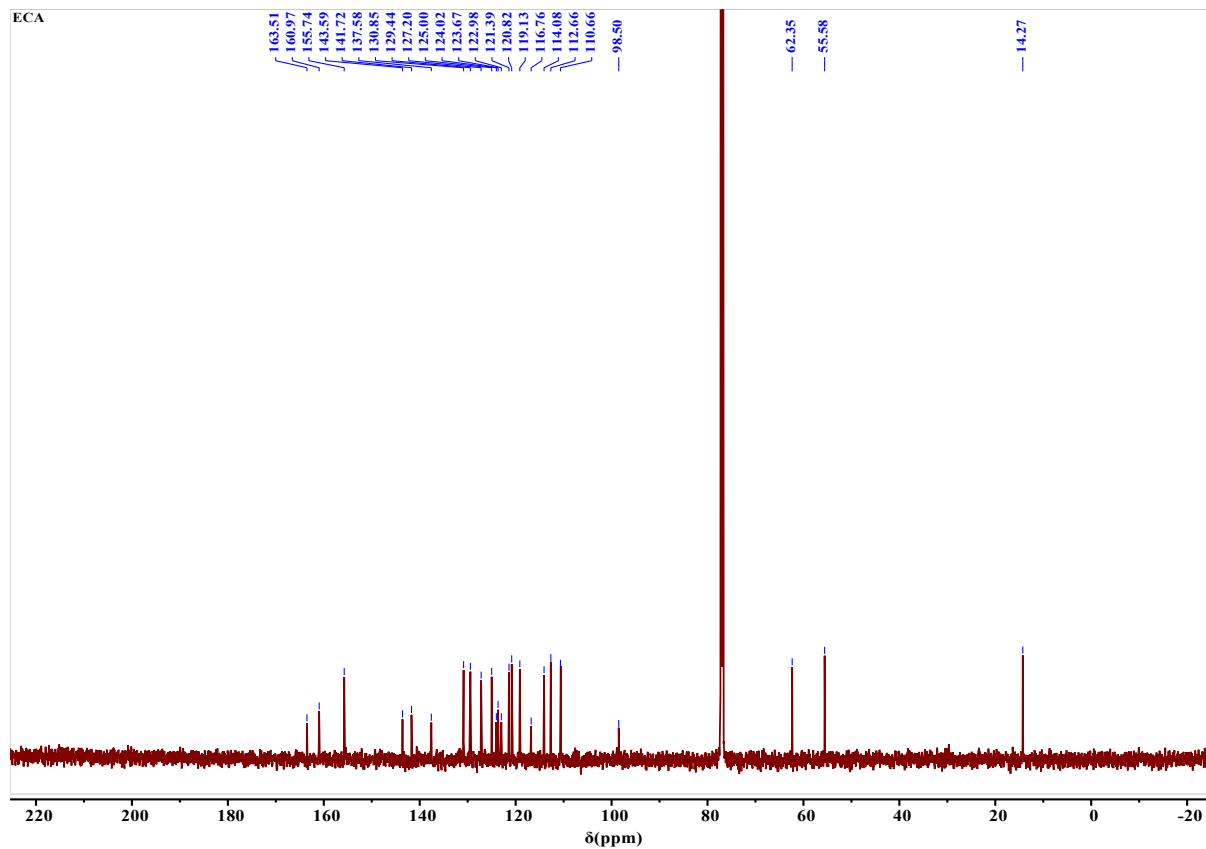

$^1\text{H}$  and  $^{13}\text{C}$  NMR of **Cz-ECA** in  $\text{CDCl}_3$ .

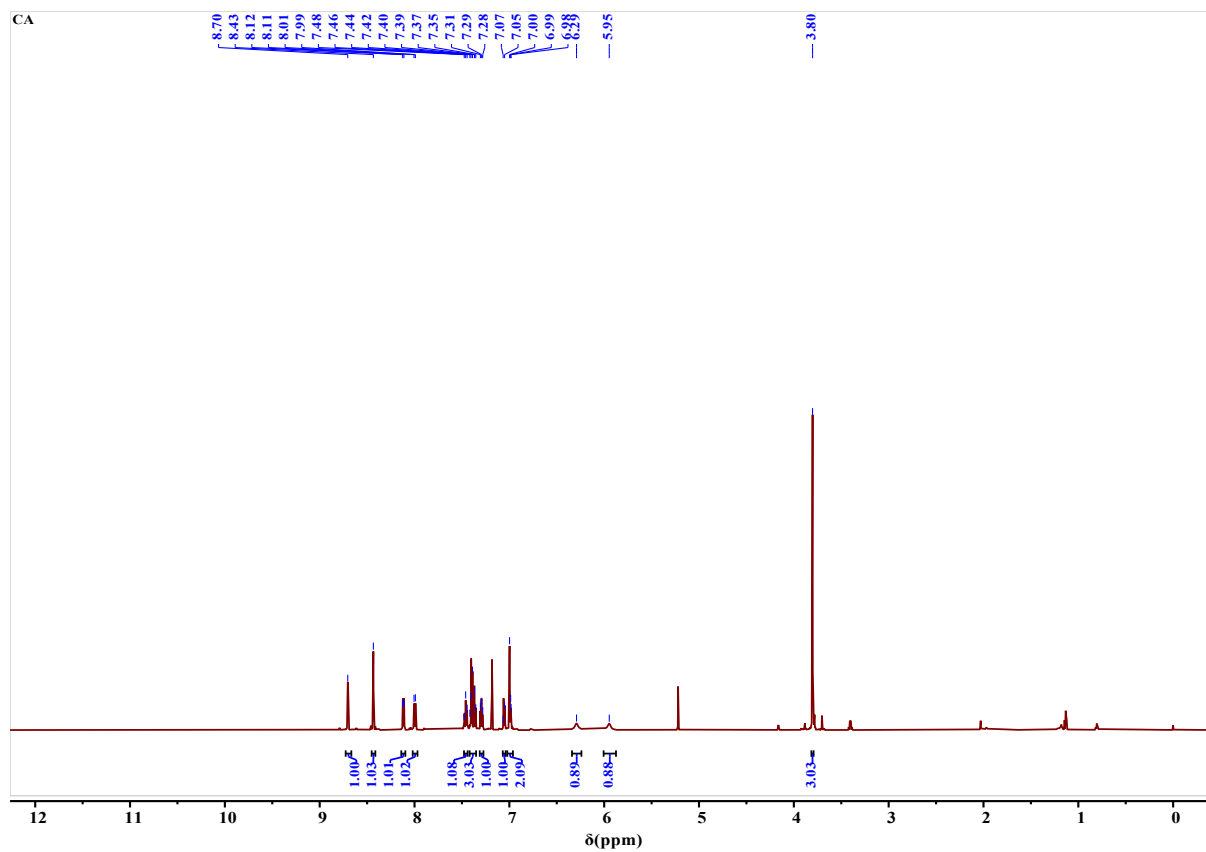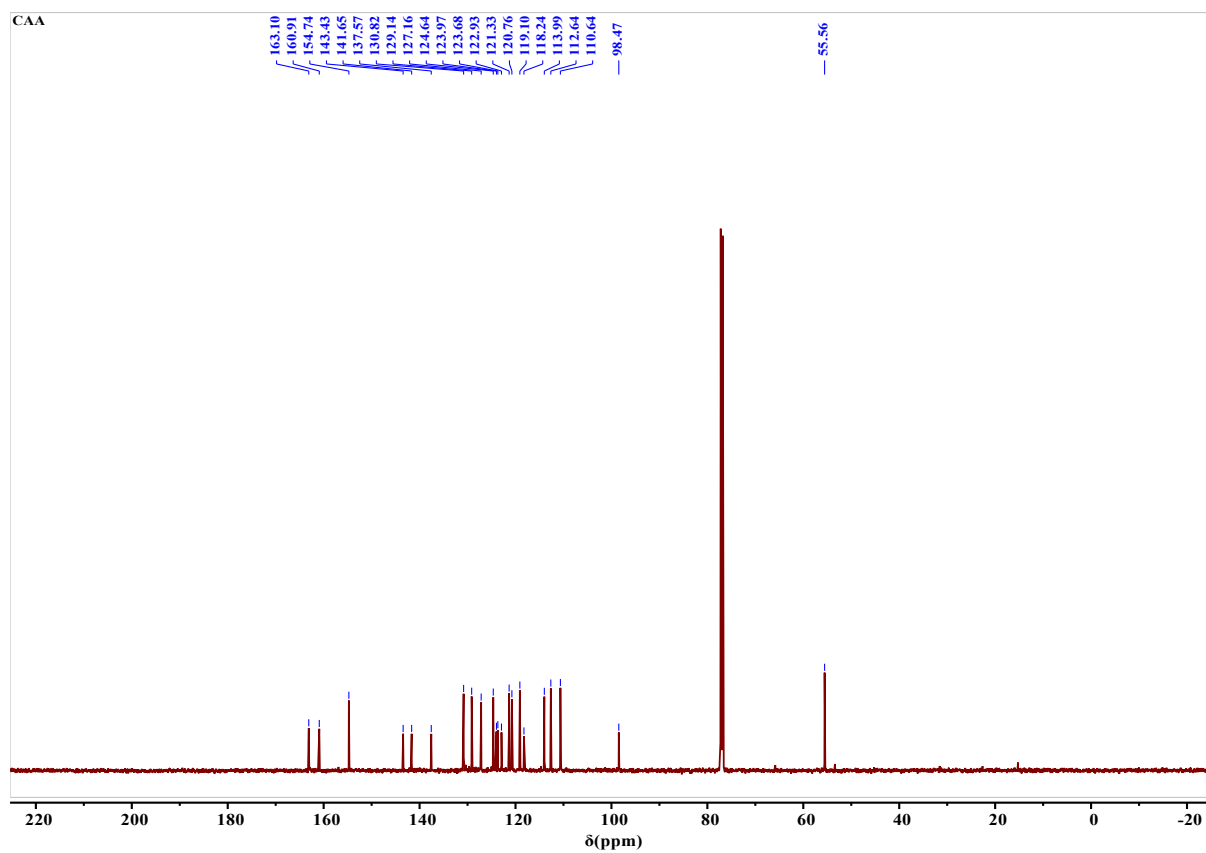

$^1\text{H}$  and  $^{13}\text{C}$  NMR of **Cz-CA** in  $\text{CDCl}_3$

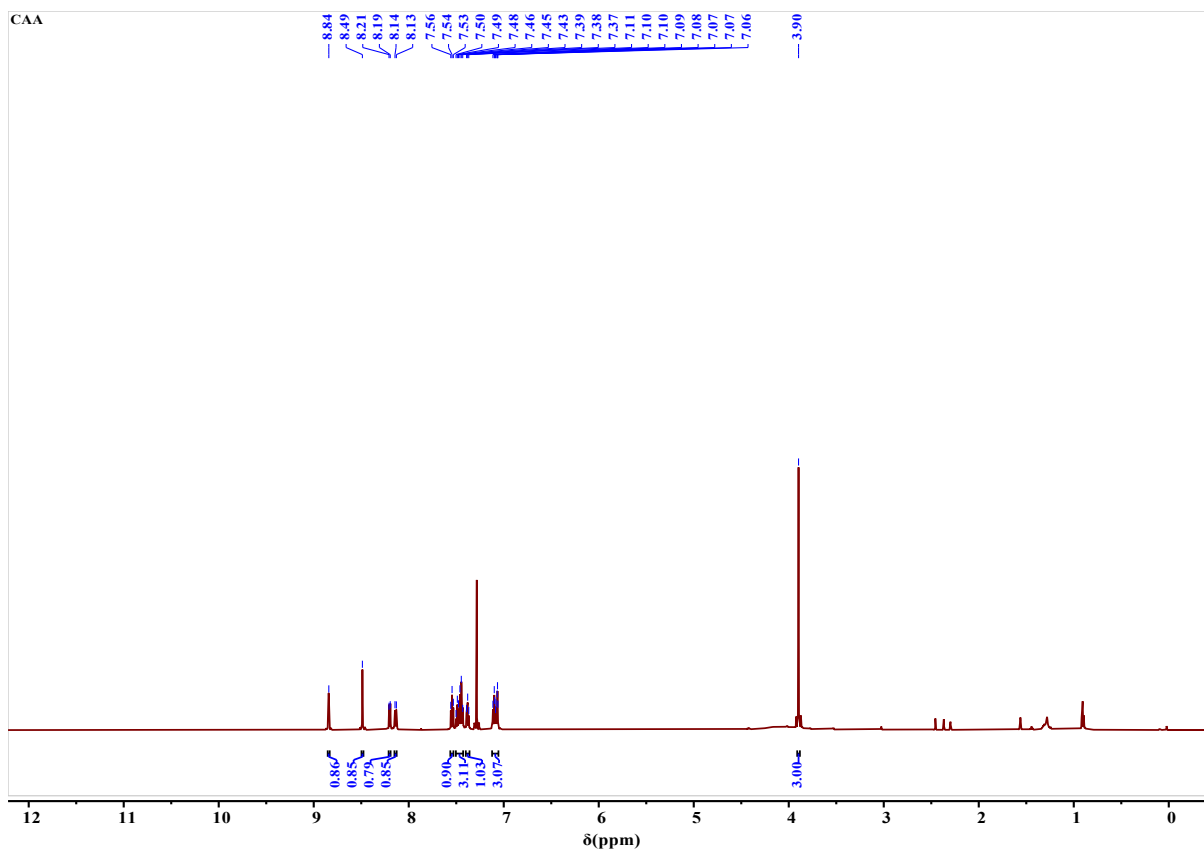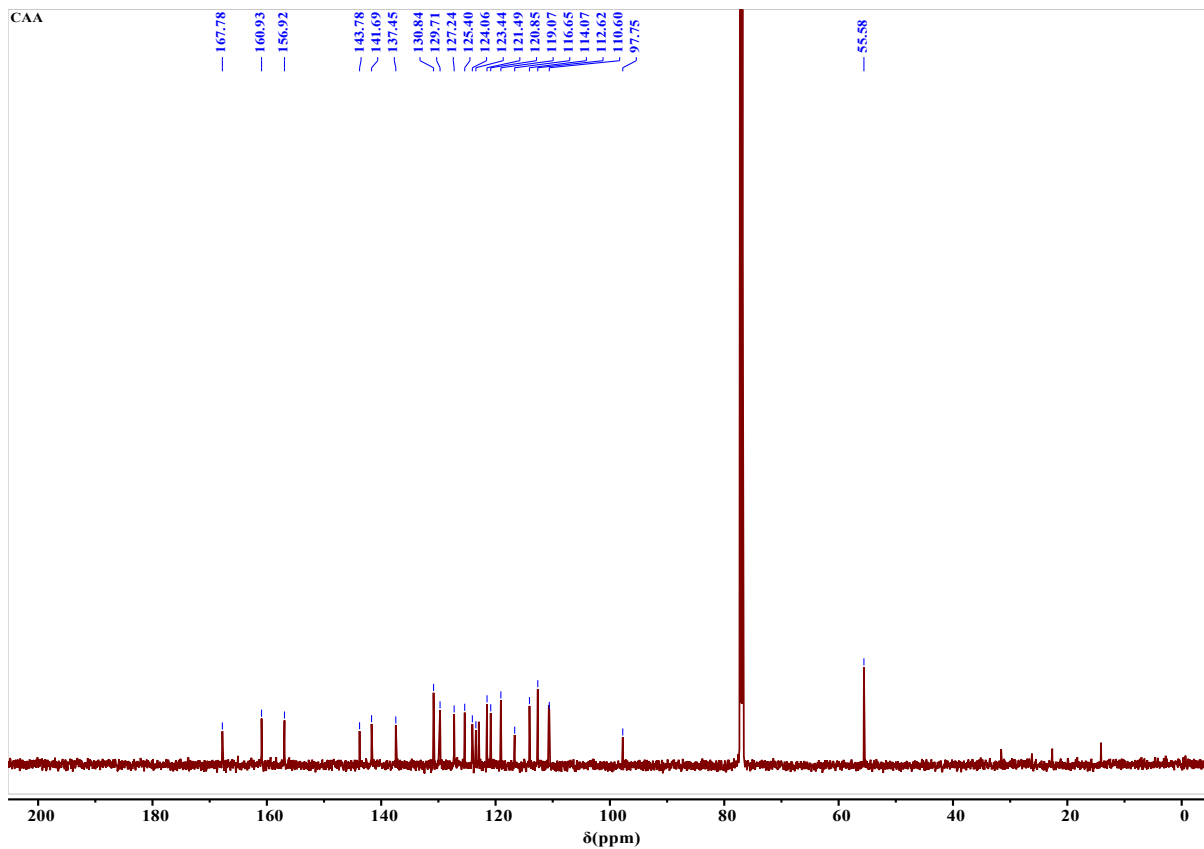

$^1\text{H}$  and  $^{13}\text{C}$  NMR of **Cz-CAA** in  $\text{CDCl}_3$ .

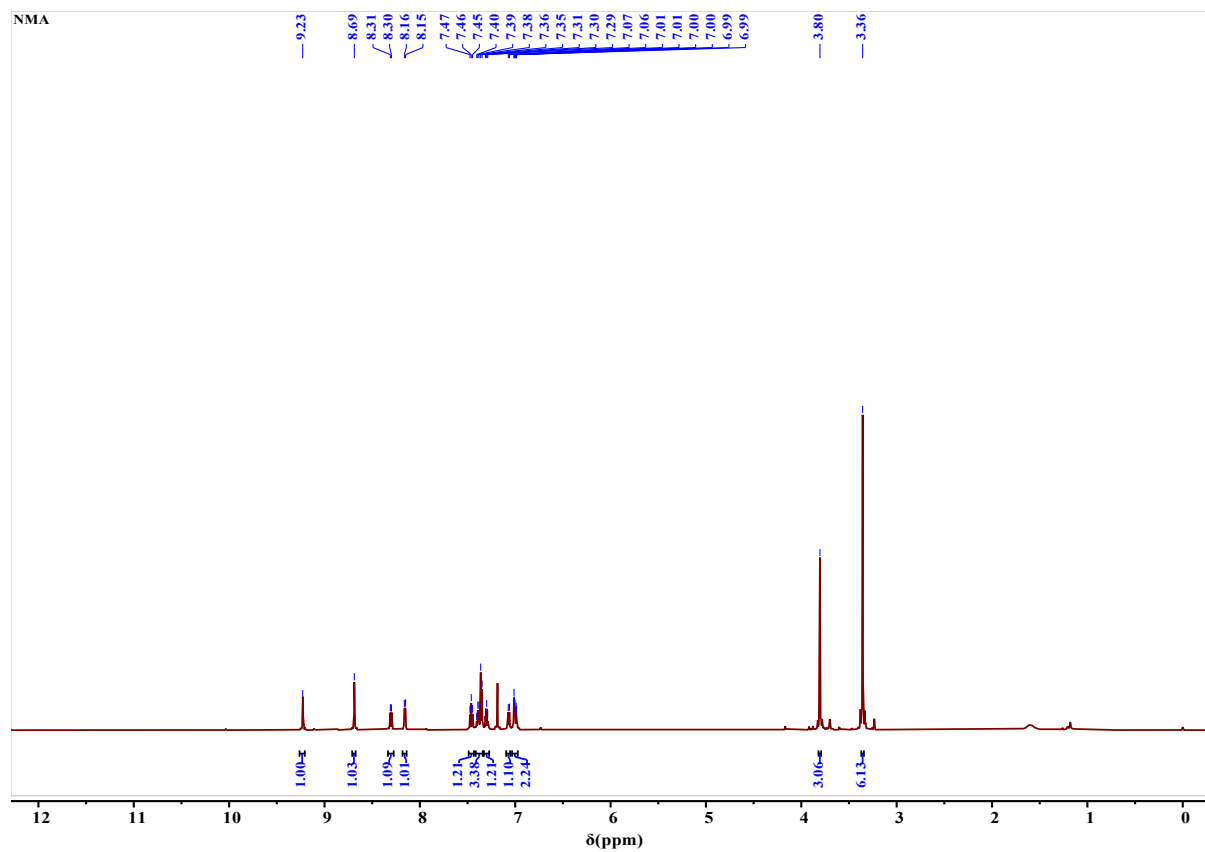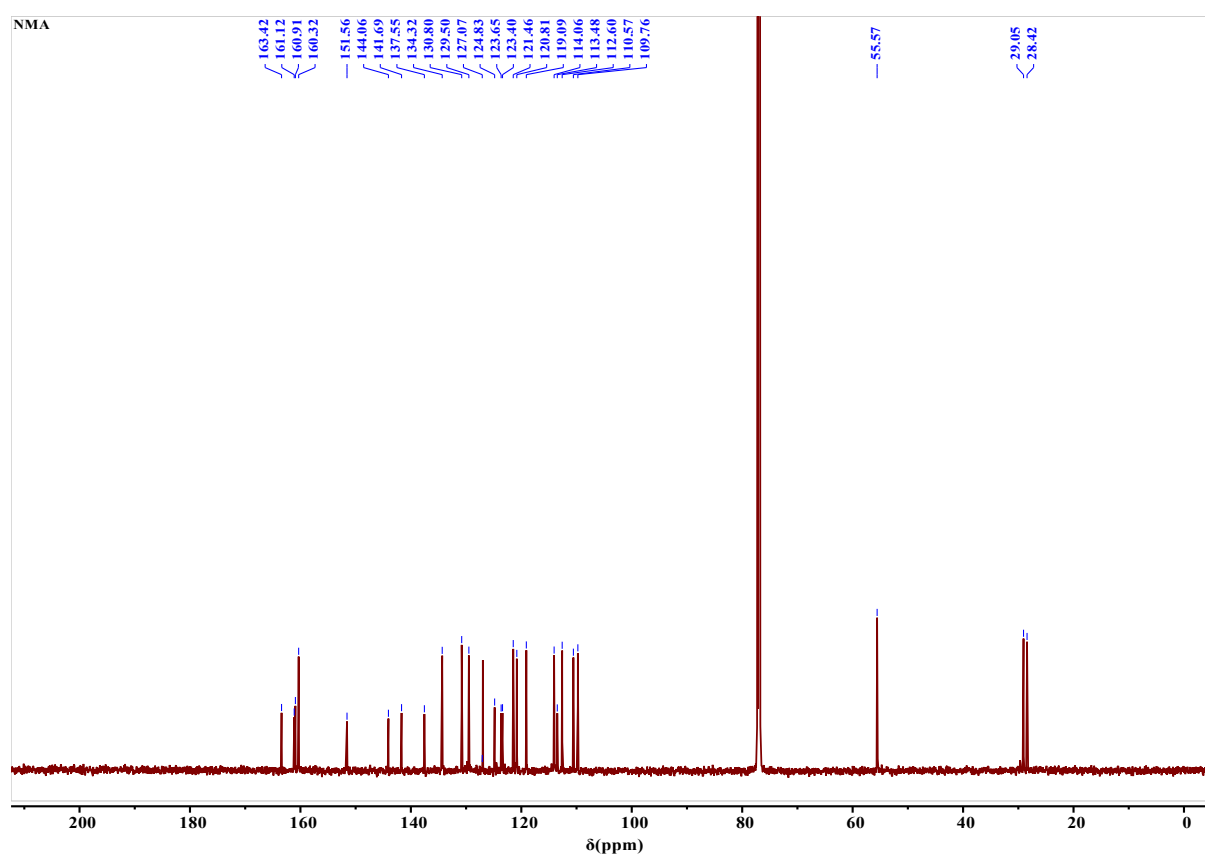

$^1\text{H}$  and  $^{13}\text{C}$  NMR of **Cz-NBA** in  $\text{CDCl}_3$ .

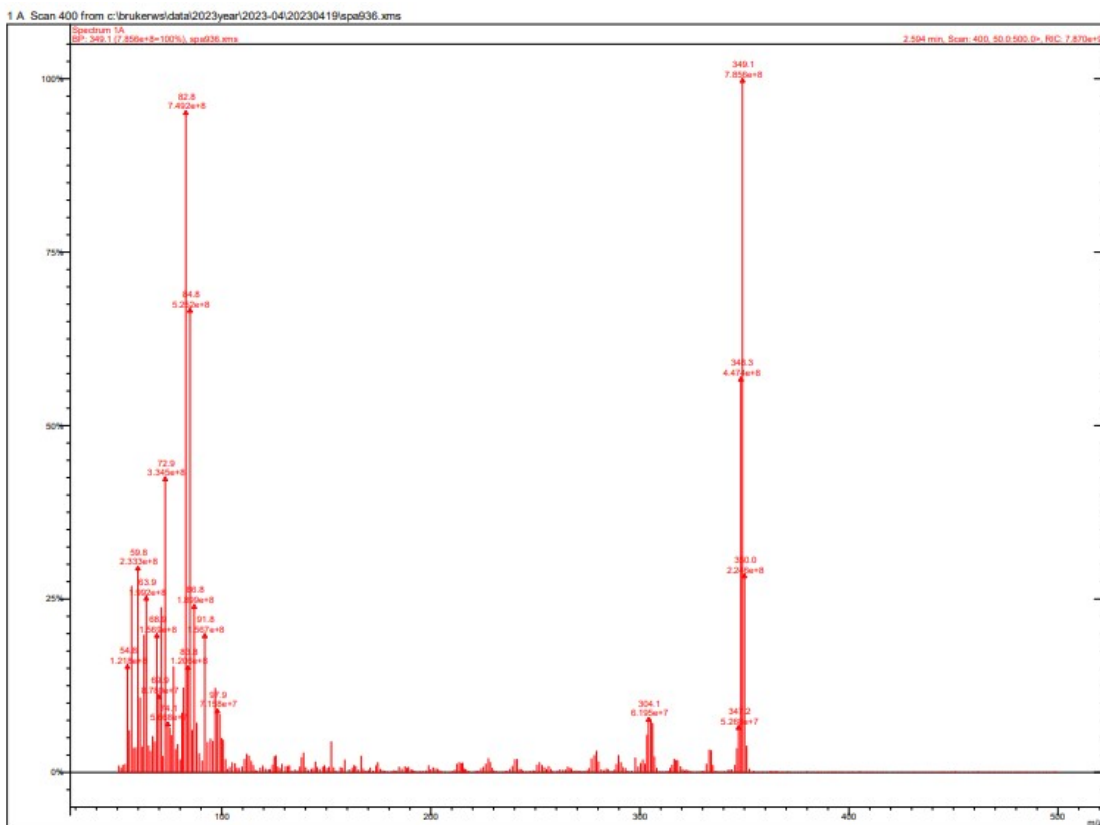

*HRMS of Cz-MN calculated: 349.1; found 349.1.*

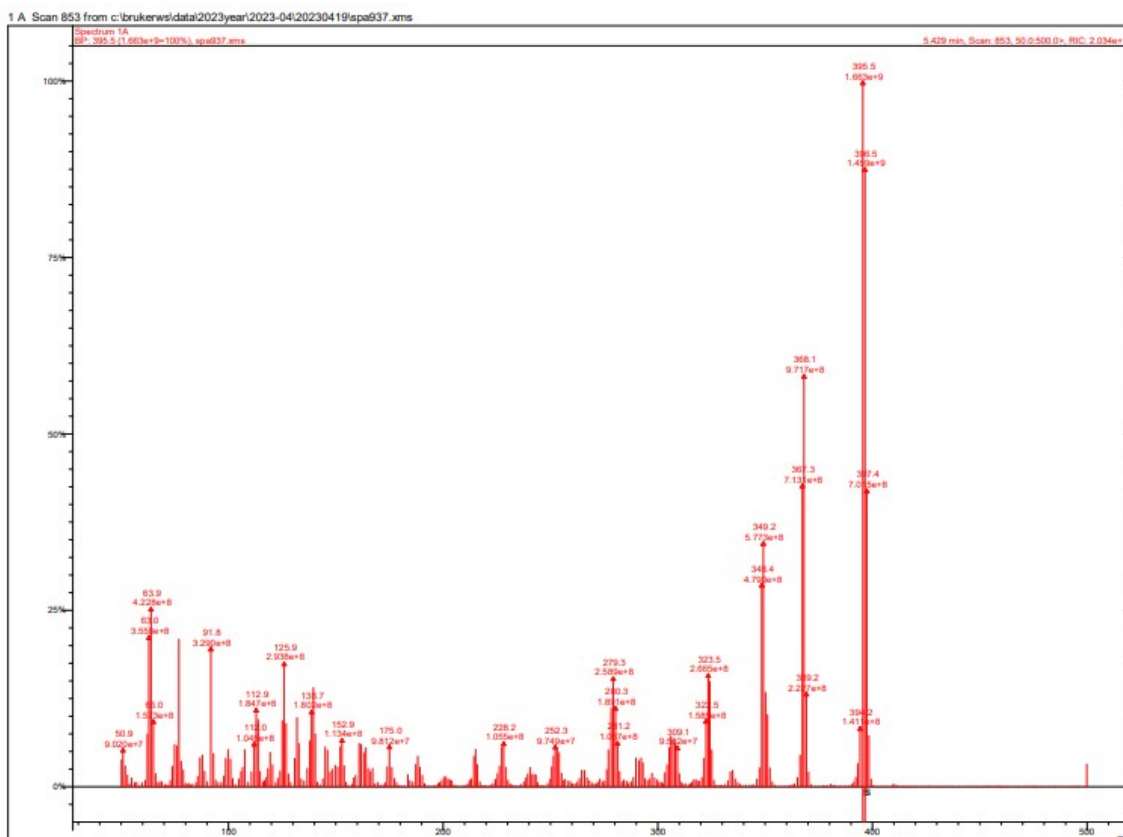

*HRMS of Cz-ECA calculated: 396.1; found 396.5.*

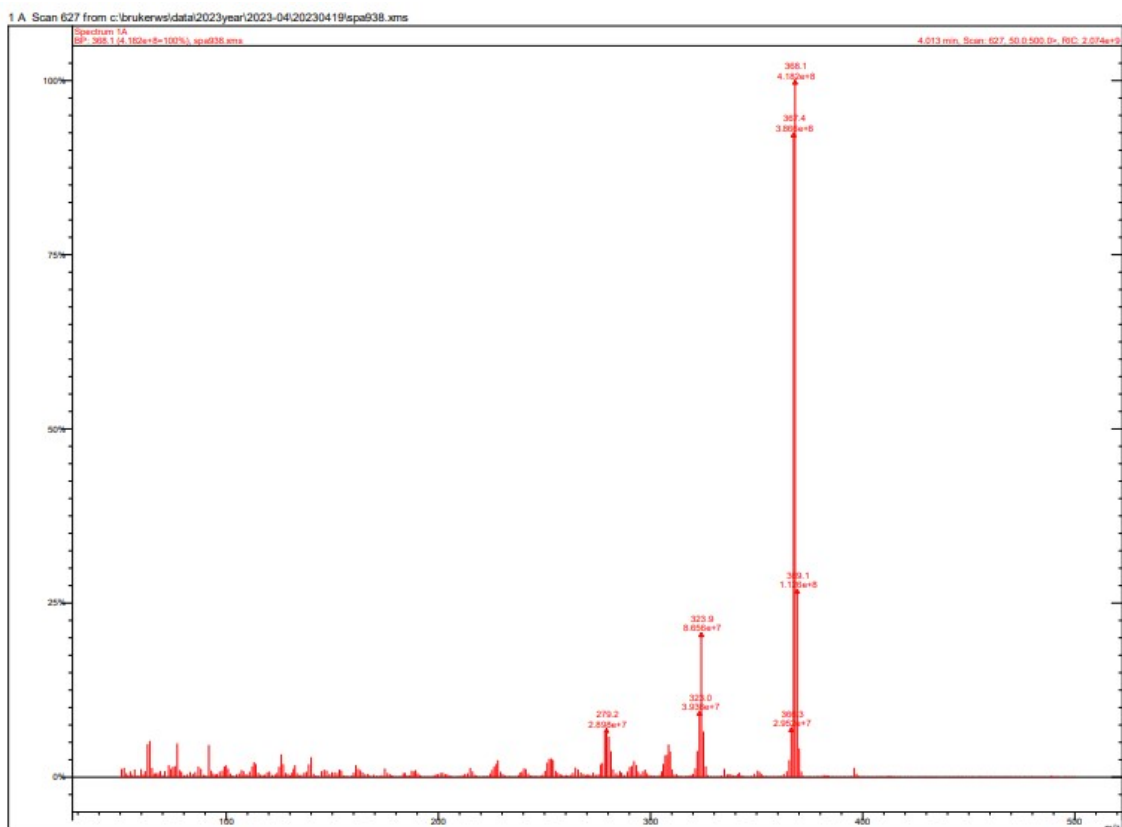

*HRMS* of **Cz-CAA** calculated: 368.1; found 368.1.

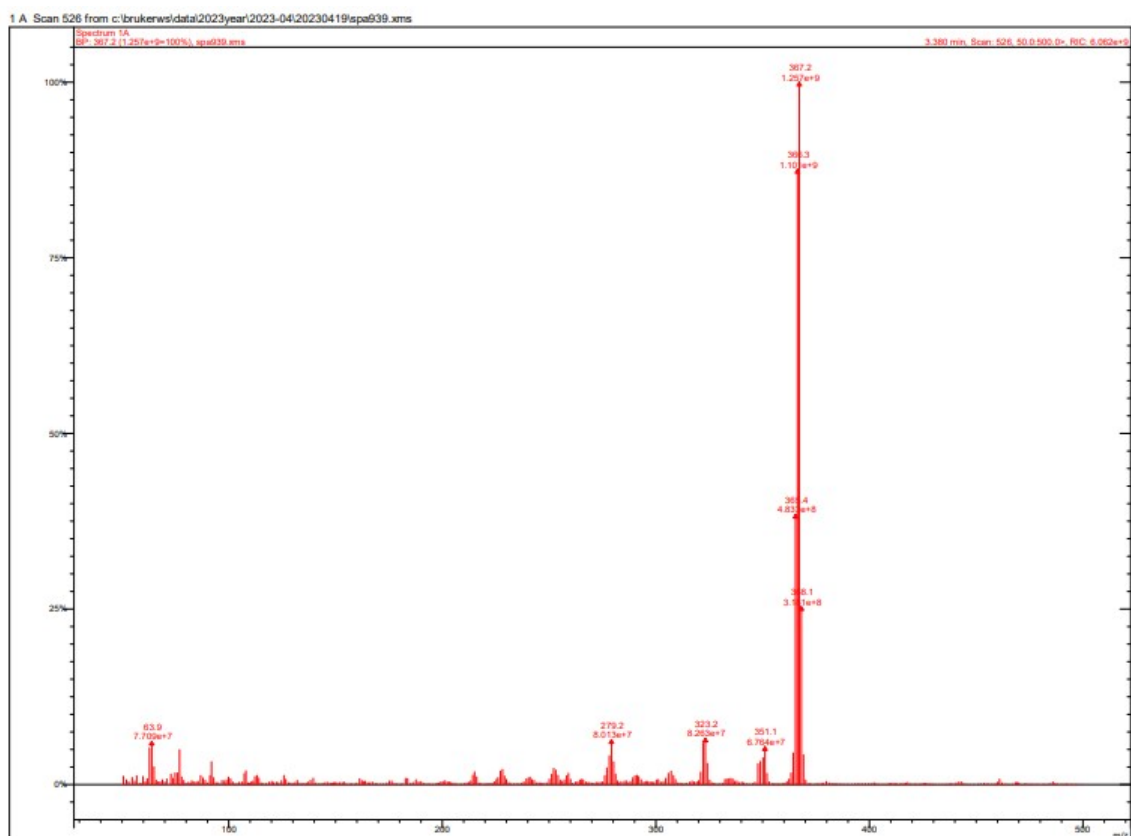

*HRMS* of **Cz-CA** calculated: 367.1; found 367.2.



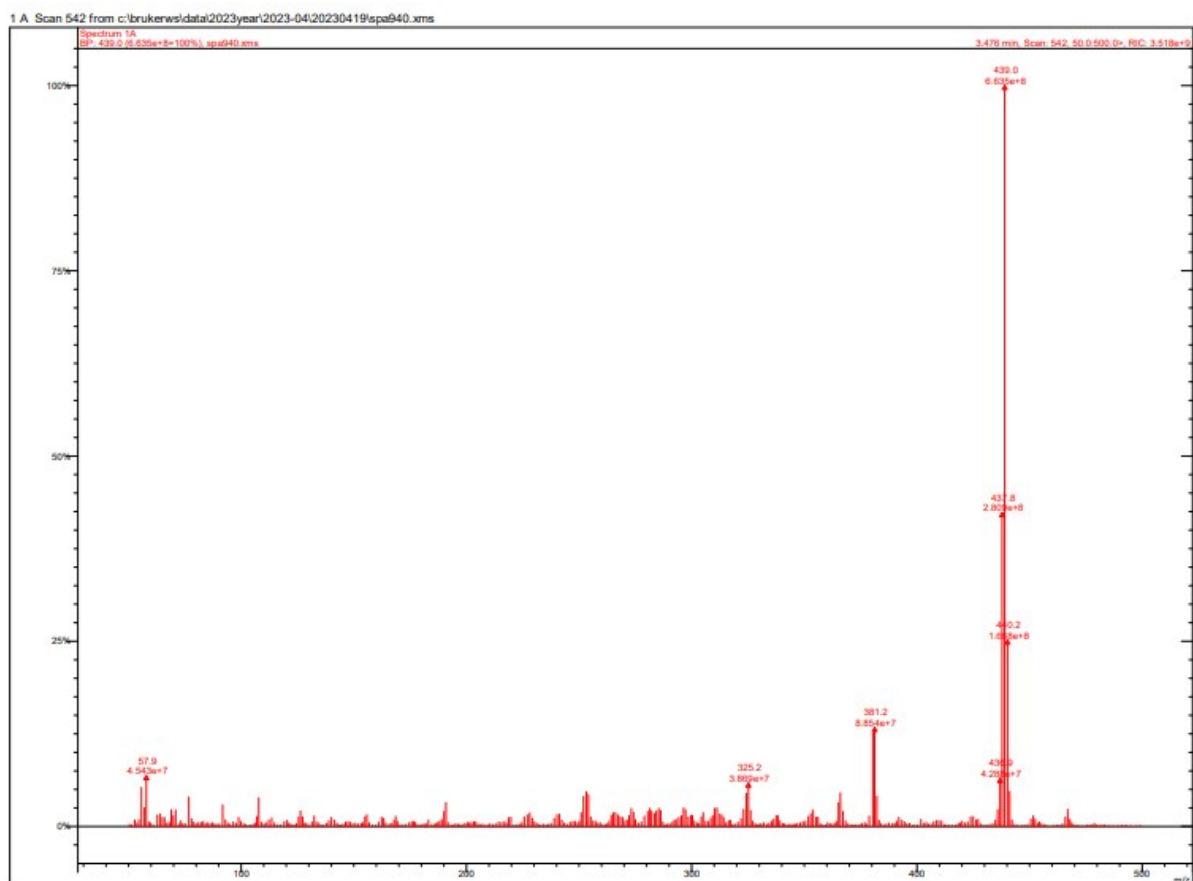

*HRMS* of **Cz-NBA** calculated: 439.1; found 439.0.

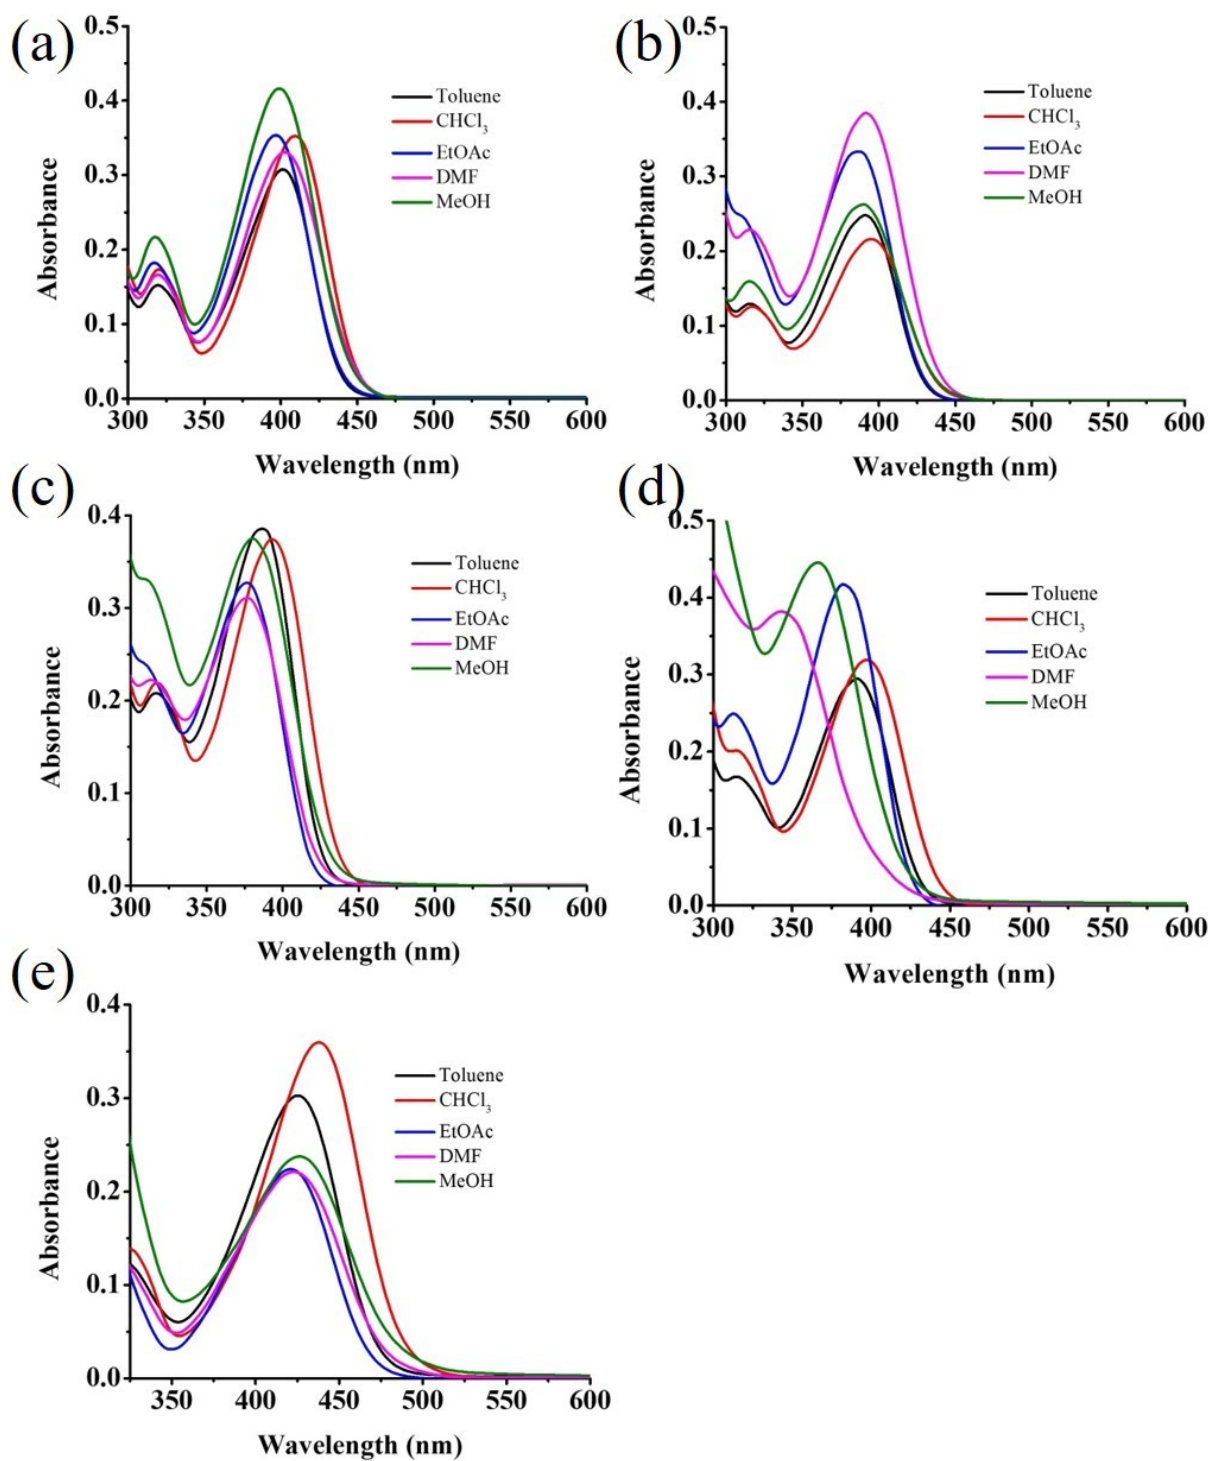

Fig. S1. Absorption spectra of (a) **Cz-MN**, (b) **Cz-ECA**, (c) **Cz-CA**, (d) **Cz-CAA** and (e) **Cz-NBA** in different solvents.

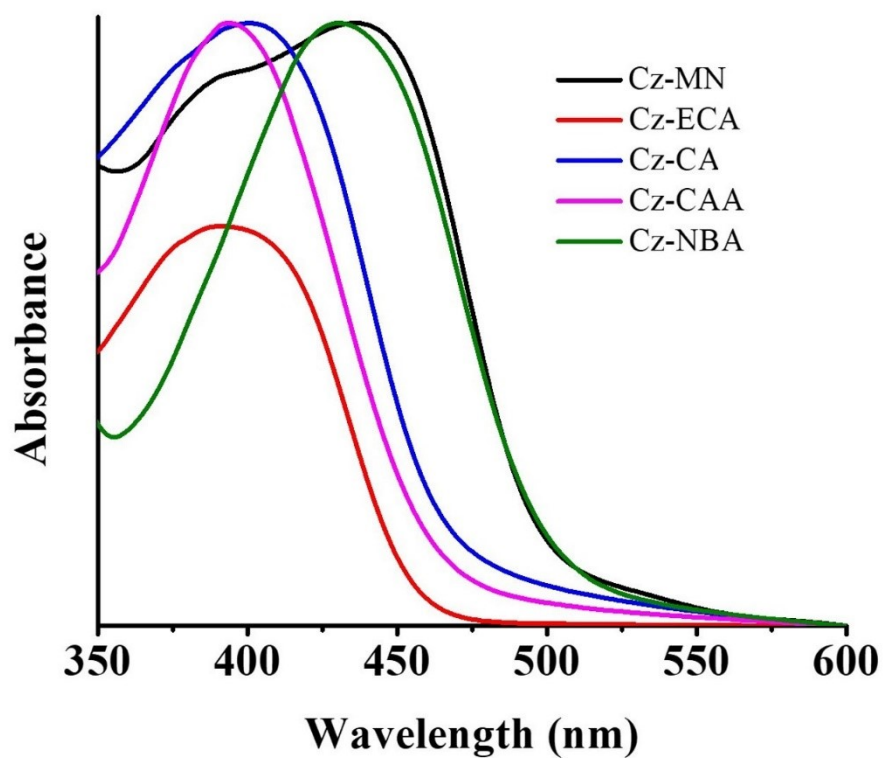

Fig. S2. Solid-state absorption spectra.

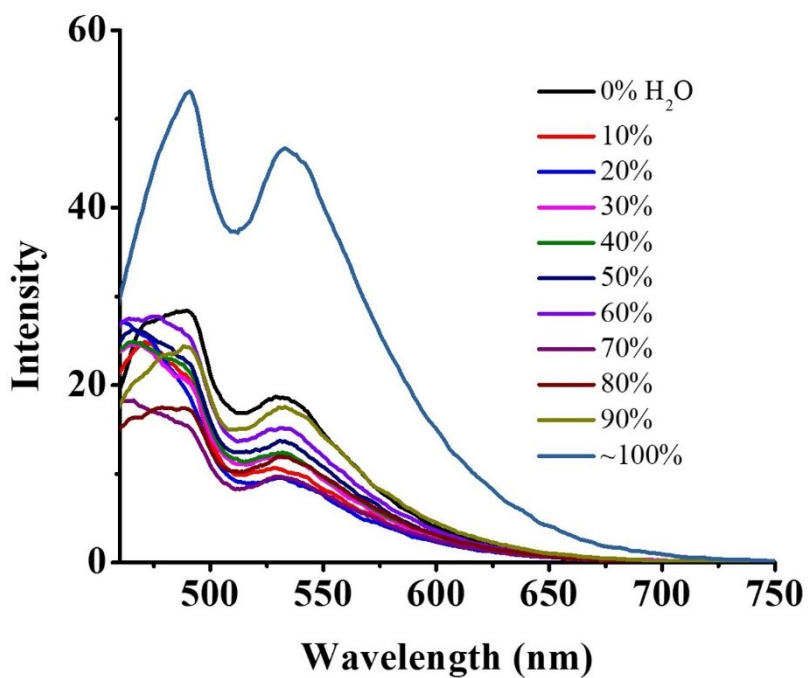

Fig. S3. AIE studies of Cz-CAA.

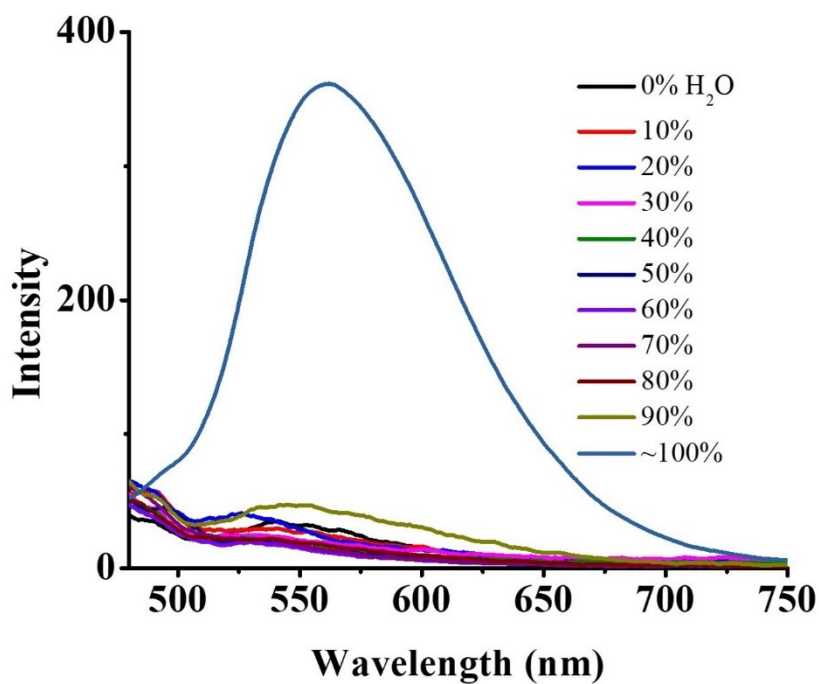

Fig. S4. AIE studies of **Cz-NBA**.

Table S1. Optical band gap of carbazole derivatives obtained from the theoretical calculation.

| <b>Compound</b> | <b>HOMO</b> | <b>LUMO</b> | <b>band gap(eV)</b> |
|-----------------|-------------|-------------|---------------------|
| Cz-MN           | -6.16       | -2.64       | 3.52                |
| Cz-ECA          | -5.89       | -2.33       | 3.56                |
| Cz-CA           | -5.90       | -2.22       | 3.68                |
| Cz-CAA          | -5.96       | -2.46       | 3.50                |
| Cz-NBA          | -5.92       | -2.70       | 3.22                |

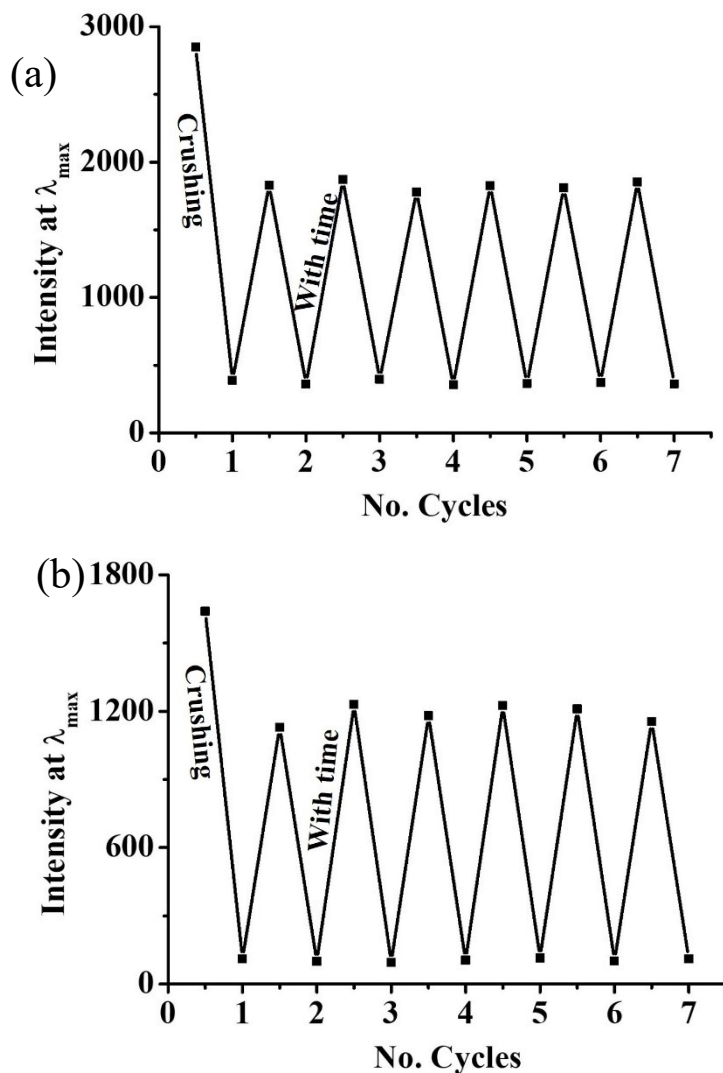

Fig. S5. Self-reversible fluorescence switching cycle of (a) Cz-MN and (b) Cz-ECA.

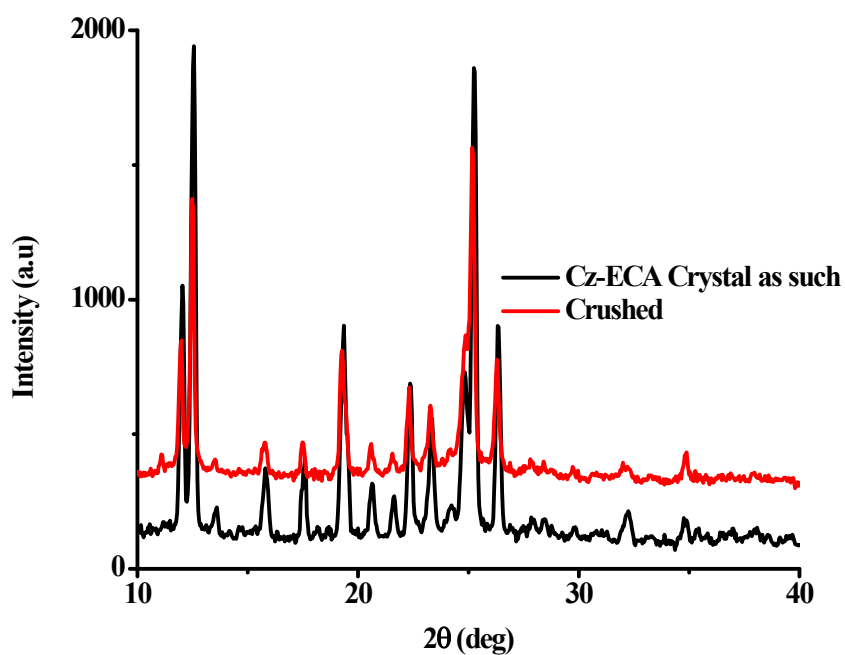

Fig. S6. PXRD of Cz-ECA before and after crushing.

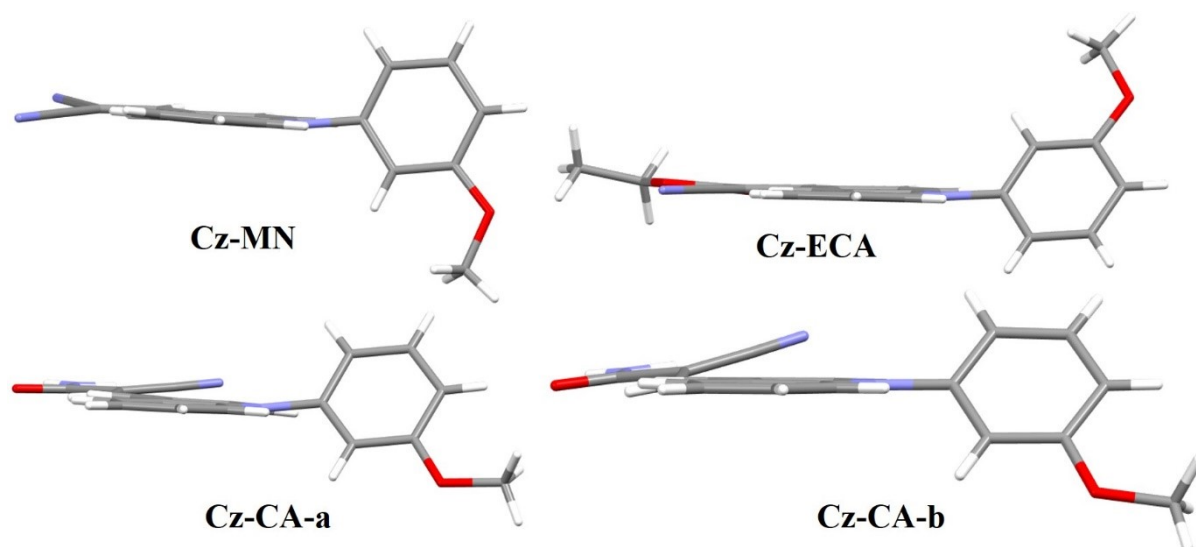

Fig. S7. Molecular conformation of **Cz-MN**, **Cz-ECA** and **Cz-CA** in the crystal lattice.

Table S2. Molecular twist between the methoxy phenyl and carbazole in the crystal lattice, measured by torsion angle ( $\tau$ ) in the

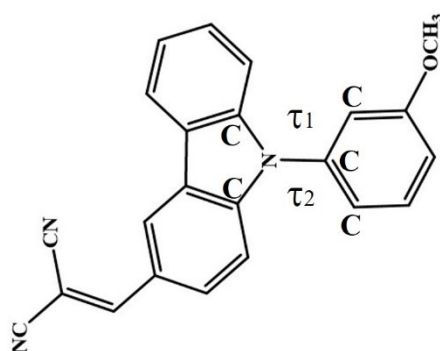

| Compound       | $\tau_1$ | $\tau_2$ |
|----------------|----------|----------|
| <b>Cz-MN</b>   | 107.08   | 95.15    |
| <b>Cz-ECA</b>  | 55.00    | 56.89    |
| <b>Cz-CA-a</b> | 54.11    | 51.07    |
| <b>Cz-CA-b</b> | 63.75    | 52.19    |

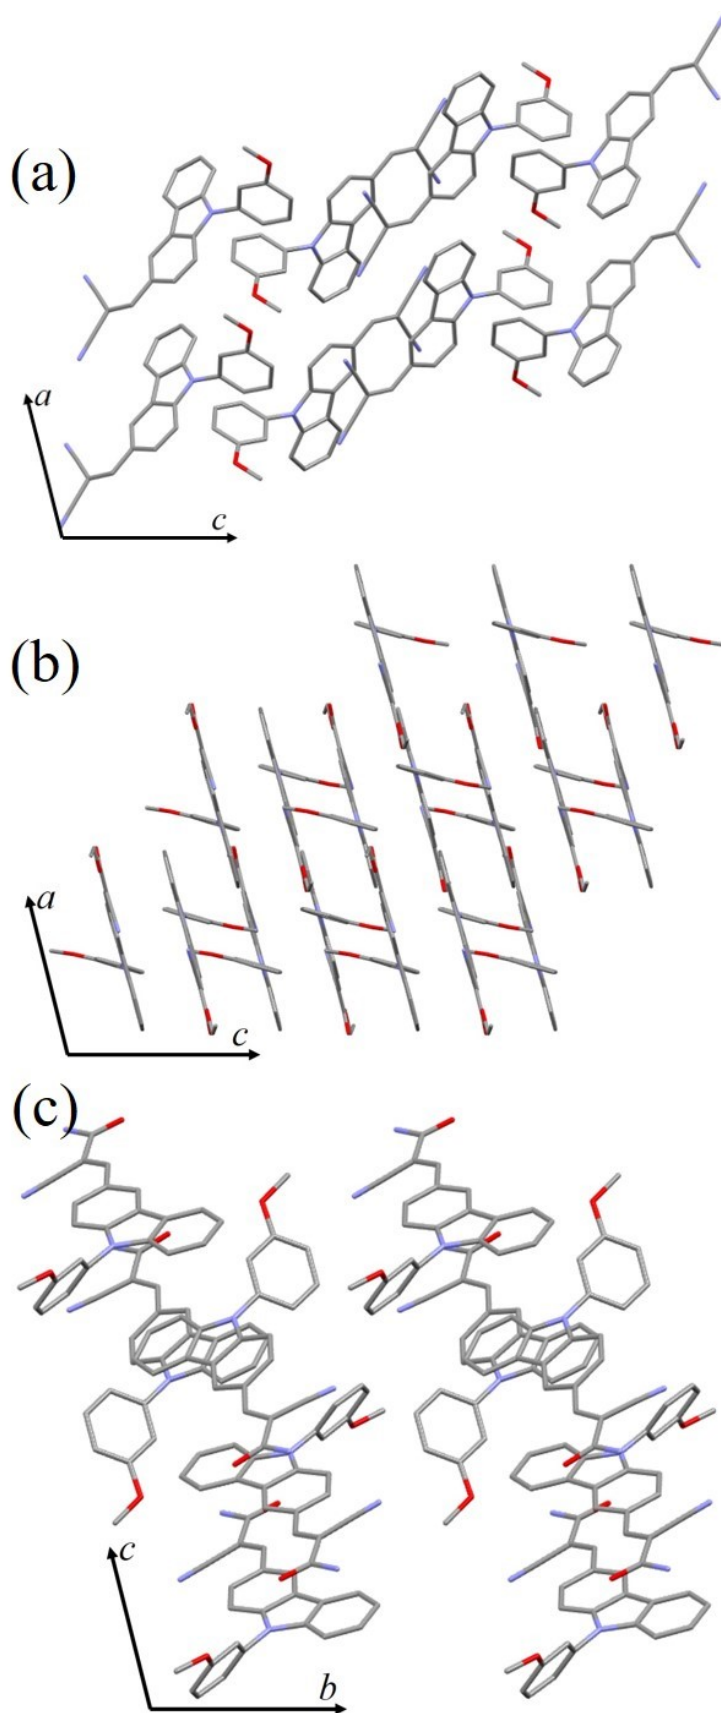

Fig. S8. Molecular packing in the crystal lattice of (a) Cz-MN, (b) Cz-ECA and (c) Cz-CA.
